# Supplementary material
Source: PubMed Central journal article supplement (PMC3009827)
Supplement: 1012795108_pnas.201012795SI.pdf [file 1012795108_pnas.201012795SI.pdf]

# Supporting Information

Kägi et al. 10.1073/pnas.1012795108

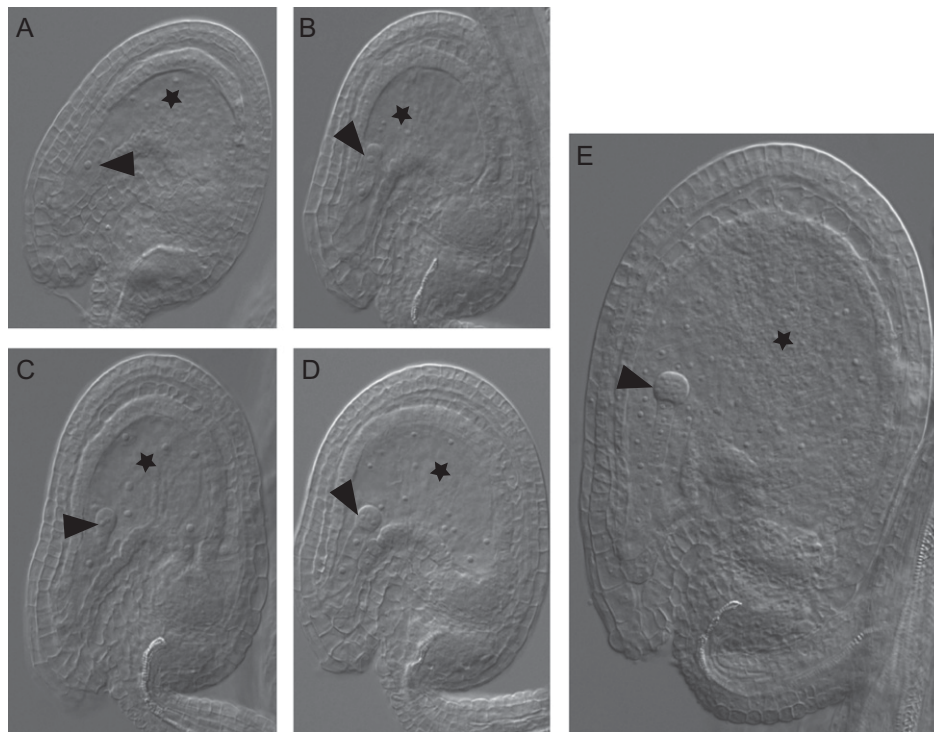

**F**

| Genotype           | Embryo (%) |       |       |       |        | Endosperm (%) |       |       |       |        |        |         |       | unfer-tilized | n |
|--------------------|------------|-------|-------|-------|--------|---------------|-------|-------|-------|--------|--------|---------|-------|---------------|---|
|                    | Zygote     | 1 nuc | 2 nuc | 4 nuc | >4 nuc | 1 nuc         | 2 nuc | 4 nuc | 8 nuc | 16 nuc | 32 nuc | >32 nuc |       |               |   |
| <i>fiona/FIONA</i> | 4.4%       | 7.0%  | 3.2%  | 4.4%  | 69.6%  | 1.3%          | 0.6%  | 5.1%  | 5.7%  | 3.8%   | 3.2%   | 69.0%   | 11.4% | 158           |   |
| <i>FIONA/FIONA</i> | 0.0%       | 0.0%  | 0.7%  | 0.7%  | 88.5%  | 0.0%          | 0.0%  | 0.0%  | 0.0%  | 0.0%   | 0.7%   | 89.2%   | 10.1% | 148           |   |

**Fig. S1.** *FIONA* is required for embryo and endosperm development. (A-D) *fiona* mutants arrested at the zygote stage (A) or one- (B), two- (C), or four- (D) celled embryo stage. (E) Normal seed of the same silique. (F) Frequencies of different embryo and endosperm arrests in *fiona/FIONA* vs. *FIONA/FIONA* plants. Arrowhead, embryo; star, endosperm; nuc, nucleate.

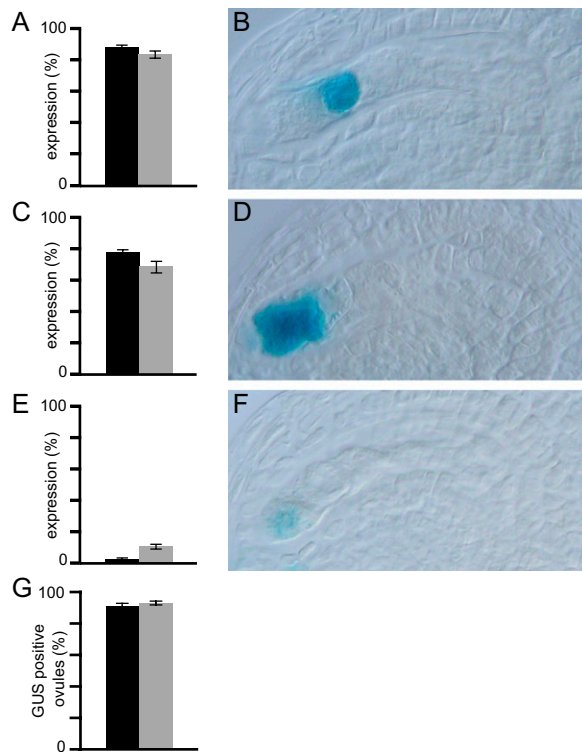

**Fig. S2.** Expression of egg and synergid cell markers in wild-type and *fiona* gametophytes. (A) Frequencies of ovules expressing ET1119 (1);  $n = 375$  for wild type,  $n = 579$  for *fiona/FIONA*. (B) Expression of the egg cell marker ET1119. (C and E) Frequencies of ovules showing normal (C) and weak (E) expression of ET2634 (1);  $n = 396$  for wild type,  $n = 401$  for *fiona/FIONA*. Gametophytes were analyzed 2 d after emasculation. Black bar, wild type; gray bar, *fiona/FIONA*. (D and F) Normal (D) and weak (F) expression of the synergid marker ET2634. (G) Frequencies of GUS-positive ovules in *FIONA/FIONA* (black bar) and *fiona/FIONA* (gray bar) plants, after fertilization with pollen from *pAt5g40260::GUS* (2) plants;  $n = 283$  for wild type,  $n = 300$  for *fiona/FIONA*. Error bars, mean  $\pm$  SEM.

- Gross-Hardt R, et al. (2007) LACHESIS restricts gametic cell fate in the female gametophyte of Arabidopsis. *PLoS Biol* 5:e47.
- Yu HJ, Hogan P, Sundaresan V (2005) Analysis of the female gametophyte transcriptome of Arabidopsis by comparative expression profiling. *Plant Physiol* 139:1853–1869.

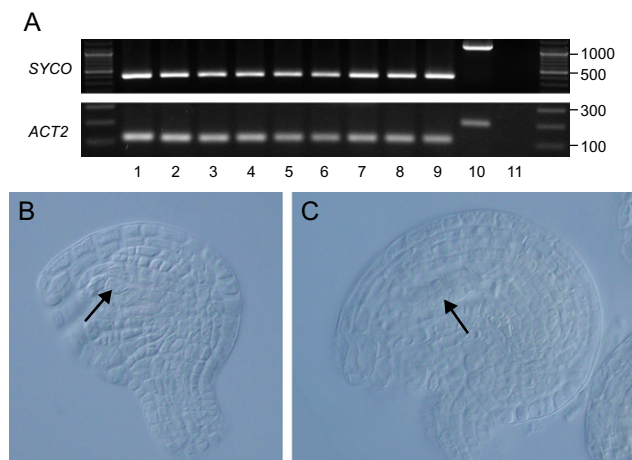

**Fig. S3.** Expression analysis of SYCO in the sporophyte and during early stages of female gametophyte development. (A) Semiquantitative RT-PCR analysis of SYCO and ACT2 transcripts from cDNAs of 1, seedlings; 2, leaves; 3, stem; 4, roots; 5, flower buds; 6, open flowers; 7, inflorescences; 8, young siliques; 9, old siliques; 10, genomic DNA; and 11, water control. Amplification of SYCO and ACT2 was performed with 35 and 27 cycles, respectively. (B and C) *pSYCO::NLS\_GUS* expression cannot be detected during early stages of female gametophyte development (arrow).

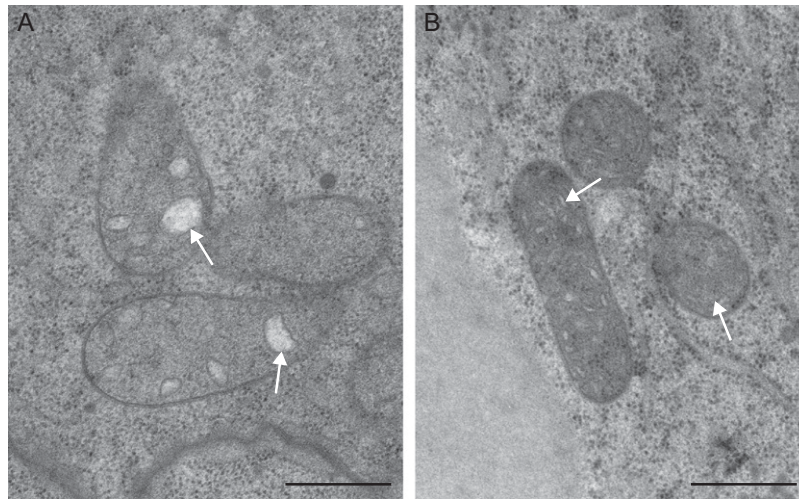

**Fig. 54.** *pMEA::SYCO\_GFP* rescues the mitochondrial defect in *syco* central cells. (A) Central cell mitochondria from *syco-1/SYCO*. (B) Central cell mitochondria from *syco-1/syco-1 pMEA::SYCO\_GFP*. White arrow, cristae. (Scale bars, 500 nm.)

```

yAAC2p -----MSS 3
AtAAC2 MVEQTQHPHILQKVSGQLLSSSVSQDIRGYASASKRPATYQKHAAYGNYSNAAFQYPLVA 60
      : :

yAAC2p NAQVKTPLPP---APAPKKESNFLIDFLMGGVSAAVAKTAASPIERVKLLIQNQDEMLK 59
AtAAC2 ASQIATTTSPVFVQAPGEKGFNFNAIDFMMGGVSAAVSKTAAAPIERVKLLIQNQDEMLK 120
      **: . . *   ** . * : ** ** : ***** : ***** : ***** : *****

yAAC2p QGTLDRKYAGILDGCFKRTATQEGVISFWRGNTANVIRYFPTQALNFAFKDKIKAMFGFKK 119
AtAAC2 AGRLTEPYKGIKIDCFGRITRDEGIGSLWRGNTANVIRYFPTQALNFAFKDYFKRLEFNFK 180
      * * . * ** ** * * : **: . : ***** : ***** : * : * . **

yAAC2p E-EGYAKWFAGNLSGGAAGALSLLFVYSLDYARTRLAADSKSSKGG-ARQFNGLIDVY 177
AtAAC2 DKDGYKWFAGNLSGGAAGASSLLFVYSLDYARTRLANDSKSAKGGGERQFNGLVDVY 240
      : : ** ***** * * ***** : ** : ** * : ** : **

yAAC2p KKTLSKSDGVAGLYRGFLPSVVGIVVYRGLYFGMYDSLKPLLLTGSLEGSFLASFLLGWVV 237
AtAAC2 KKTLSKSDGIAGLYRGNISGAGIIVYRGLYFGLYDSVKPVLTTGDLQDSFFASFALGWLI 300
      ***** : ***** * . ** : ***** : ** : ** : ** : * : ** : ** : ** : ** : ** : ** : ** : **

yAAC2p TTGASTCSYPLDTRRRMMTSGQAVKYDGAFDCLRKIVAAEGVSLFKGCGANILRGVA 297
AtAAC2 TNGAGLASYPIDTRRRMMTSGEAVKYKSSFDQFSQIVKKEGAKSLFKGAGANILRAVA 360
      * . ** . : ** : ***** : ***** : ** : ** : ** : ** : ** : ** : ** : ** : ** : ** : **

yAAC2p GAGVISMVDQLQMILFGKFKF--- 318
AtAAC2 GAGVLAGYDKLQIVFGKKGSGGA 385
      **** : : ** : ** : ** : ** : ** :

```

**Fig. 55.** Alignment of *Saccharomyces cerevisiae* Aac2 (yAac2p) and *Arabidopsis* AAC2 (AtAAC2) protein sequences. The position of the dominant mutation A199D is shown in red. Sequence alignment was performed with ClustalW2, using default parameters. Asterisks (\*) indicate conserved residue; colons (:) indicate conserved substitution; periods (.) indicate semiconserved substitution.
